# Supplementary material
Source: PubMed Central journal article supplement (PMC3478103)
Supplement: NIHMS412147-supplement-01.pdf [file NIHMS412147-supplement-01.pdf]

**Table S1.** Characteristics of thirty-one ancestry informative markers (AIMs)

| Marker     | dbSNP accession | Location | Allele frequency in three different ancestral populations |                 |                 | $\delta^b$ |       |       | HWE test <sup>c</sup> |
|------------|-----------------|----------|-----------------------------------------------------------|-----------------|-----------------|------------|-------|-------|-----------------------|
|            |                 |          | Eu <sup>a</sup>                                           | Af <sup>a</sup> | NA <sup>a</sup> | Eu/Af      | Af/NA | Eu/NA |                       |
| Rs3188519  | rs3188519       | 1p34.1   | 0.37                                                      | 0.76            | 0.32            | 0.39       | 0.44  | 0.05  | 0.34                  |
| FY         | rs2814778       | 1q23.2   | 0.99                                                      | 0               | 0.99            | 0.99       | 0.99  | 0     | 0.52                  |
| Rs6003     | rs6003          | 1q31.3   | 0.08                                                      | 0.7             | 0.03            | 0.62       | 0.67  | 0.05  | 0.73                  |
| TSC1102055 | rs2065160       | 1q32.1   | 0.92                                                      | 0.5             | 0.17            | 0.42       | 0.32  | 0.75  | 0.18                  |
| Rs723632   | rs723632        | 1q32.3   | 0.92                                                      | 0.1             | 0.67            | 0.82       | 0.57  | 0.25  | 0.36                  |
| WI16857    | rs3287          | 2p16.1   | 0.2                                                       | 0.73            | 0.21            | 0.53       | 0.53  | 0.01  | 0.21                  |
| WI11153    | rs17203         | 3p12.3   | 0.15                                                      | 0.81            | 0.76            | 0.66       | 0.05  | 0.61  | 0.71                  |
| Rs584059   | rs584059        | 3q22.3   | 0.14                                                      | 0.49            | 0.47            | 0.36       | 0.03  | 0.33  | 0.65                  |
| GC1        | rs7041          | 4q13.3   | 0.41                                                      | 0.93            | 0.45            | 0.52       | 0.48  | 0.04  | 0.05                  |
| Rs930072   | rs930072        | 5p13.2   | 0.1                                                       | 0.96            | 0.45            | 0.87       | 0.51  | 0.35  | 0.31                  |
| SGC30055   | rs3317          | 5q23.1   | 0.59                                                      | 0.05            | 0.73            | 0.53       | 0.68  | 0.15  | 0.66                  |
| Rs1985080  | rs1985080       | 7p14.3   | 0.64                                                      | 0.1             | 0.97            | 0.54       | 0.87  | 0.32  | 0.72                  |
| LPL        | rs285           | 8p21.3   | 0.52                                                      | 0.97            | 0.45            | 0.45       | 0.52  | 0.07  | 0.5                   |
| Rs518116   | rs518116        | 9q33.3   | 0.67                                                      | 0.13            | 0.58            | 0.54       | 0.45  | 0.09  | 0.36                  |
| Rs7349     | rs7349          | 10p11.22 | 0.87                                                      | 0.04            | 0.96            | 0.83       | 0.92  | 0.08  | 1                     |
| Rs994174   | rs994174        | 10q23.1  | 0.25                                                      | 0.76            | 0.26            | 0.51       | 0.49  | 0.02  | 0.33                  |
| L192       | rs594689        | 11q11    | 0.47                                                      | 0.09            | 0.13            | 0.37       | 0.04  | 0.34  | 0.08                  |
| TYR192     | rs1042602       | 11q21    | 0.47                                                      | 0               | 0.05            | 0.46       | 0.05  | 0.41  | 1                     |
| DRD2 Taq_D | rs1800498       | 11q23.1  | 0.65                                                      | 0.14            | 0.09            | 0.51       | 0.05  | 0.56  | 0.64                  |
| Rs326946   | rs326946        | 11q23.1  | 0.17                                                      | 0.61            | 0.07            | 0.44       | 0.54  | 0.1   | 0.13                  |
| Rs146026   | rs146026        | 13q13.1  | 0.92                                                      | 0.26            | 0.83            | 0.66       | 0.57  | 0.09  | 0.55                  |
| OCA2       | rs1800404       | 15q13.1  | 0.72                                                      | 0.14            | 0.48            | 0.58       | 0.34  | 0.23  | 0.75                  |
| Rs2228478  | rs2228478       | 16q24.3  | 0.14                                                      | 0.51            | 0.04            | 0.37       | 0.47  | 0.09  | 0.13                  |
| WI7423     | rs2816          | 17p12    | 0.49                                                      | 0               | 0.08            | 0.49       | 0.07  | 0.42  | 0.01*                 |
| WI14867    | rs2891          | 17p13.2  | 0.51                                                      | 0.02            | 0.43            | 0.49       | 0.41  | 0.08  | 0.81                  |
| Rs2077863  | rs2077863       | 18p11    | 0.93                                                      | 0.51            | 0.93            | 0.41       | 0.42  | 0     | 0.81                  |
| Rs1989486  | rs1989486       | 19q13.42 | 0.58                                                      | 0.04            | 0.4             | 0.53       | 0.36  | 0.17  | 0.13                  |
| Rs3188520  | rs3188520       | 20q11.22 | 0.35                                                      | 0.83            | 0.44            | 0.48       | 0.39  | 0.09  | 0.68                  |
| Rs722098   | rs722098        | 21q21.1  | 0.18                                                      | 0.9             | 0.72            | 0.73       | 0.19  | 0.54  | 0.53                  |
| Rs235936   | rs235936        | 21q21.3  | 0.49                                                      | 0.18            | 0.37            | 0.31       | 0.2   | 0.11  | 0.22                  |
| MID93      | rs16383         | 22q13.2  | 0.8                                                       | 0.27            | 0.11            | 0.52       | 0.17  | 0.69  | 0.73                  |

<sup>a</sup> Eu: European subjects; Af: African subjects; NA: Native American subjects<sup>b</sup>  $\delta$ : difference of allele frequencies between two ancestral populations (Eu/Af: Europeans and Africans; Af/NA: Africans and Native Americans; Eu/NA: Europeans and Native Americans)<sup>c</sup> P-value

\* Marker out of Hardy-Weinberg equilibrium in SAGE subjects (N = 352)

**Table S2.** Association of asthma disease status with 30 AIMs in a subset (N = 200) of 352 SAGE subjects <sup>a</sup>.

| Independent predictor | Count of positives <sup>b</sup> ( $P$ value < 0.05) <sup>c</sup> |                                                               |                                               |
|-----------------------|------------------------------------------------------------------|---------------------------------------------------------------|-----------------------------------------------|
|                       | No adjustment                                                    | w/covariates adjustment, but w/o IAEs adjustment <sup>d</sup> | w/covariates and IAEs adjustment <sup>e</sup> |
| AIMs (N = 30)         | 21                                                               | 14                                                            | 1                                             |

NOTE:

- <sup>a</sup> Cases in the subset are the subjects with top 100 African proportions; controls in the subset are the subjects with bottom 100 African proportions.
- <sup>b</sup> Under 5% type I error rate ( $P = 0.05$ ), counts of expected false positives are 1.5 markers.
- <sup>c</sup> Analyses were carried out by using multiple regression analysis.
- <sup>d</sup> Covariates included in the analyses are age, gender and SES.
- <sup>e</sup> Counts of positives are the same by including IAEs computed by either ADMIXMAP or Structure2.1.
